# Supplementary material
Source: PubMed Central journal article supplement (PMC3082521)
Supplement: NIHMS1733-supplement-Supplementary_Figure.pdf [file NIHMS1733-supplement-Supplementary_Figure.pdf]

## Supplemental Figure

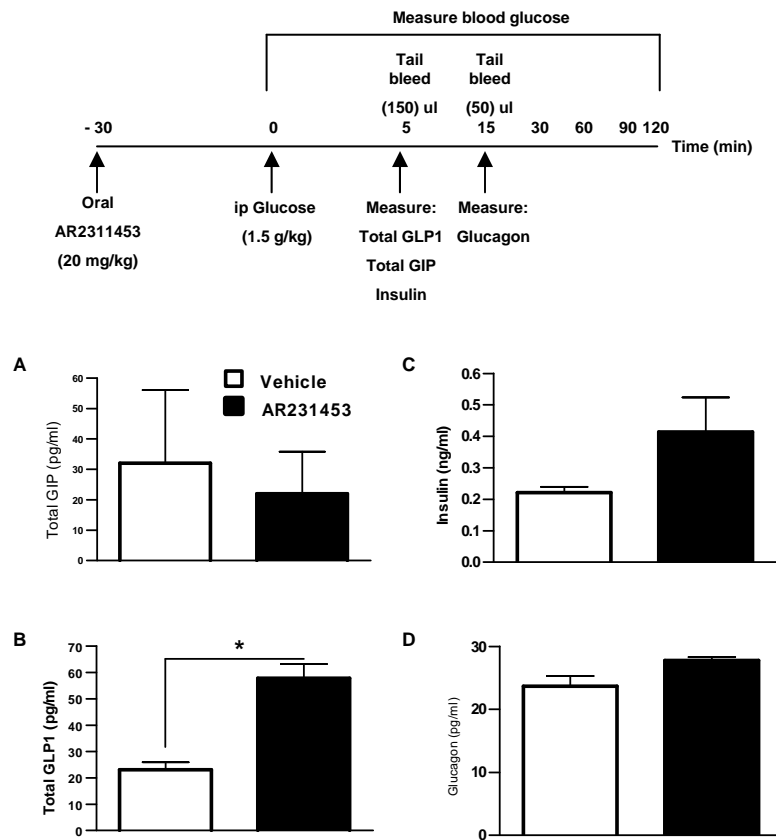

Supplemental Figure 1 GPR119 activation and plasma levels of GIP, GLP-1, insulin, and glucagon in WT mice during an intraperitoneal glucose tolerance test (IPGTT)

Age matched WT mice were fasted over night and oral AR231453 (20 mg/kg) or vehicle was administered 30 min before ip glucose load (OGTT) (1.5g/kg). Plasma was obtained 5 minutes after glucose administration. This sample was used to simultaneously measure the levels of total GIP immunoreactivity (A), total GLP-1 immunoreactivity (B) and insulin (C). A second plasma sample was collected from each mouse at 15 min after glucose for the measurement of glucagon levels (D). Statistical analysis was assessed by ANOVA. \* $p < 0.05$ ;
